# Supplementary material for: Transmission Dynamics of the Recently-Identified BYD Virus Causing Duck Egg-Drop Syndrome
Source: PLoS One. 2012 Apr 18;7(4):e35161. doi: 10.1371/journal.pone.0035161 (PMC3329443; doi:10.1371/journal.pone.0035161)
Supplement: Figure S1 — Sensitivity of the total egg production over a month to changes in the recovery rate. (PDF) [file pone.0035161.s002.pdf]

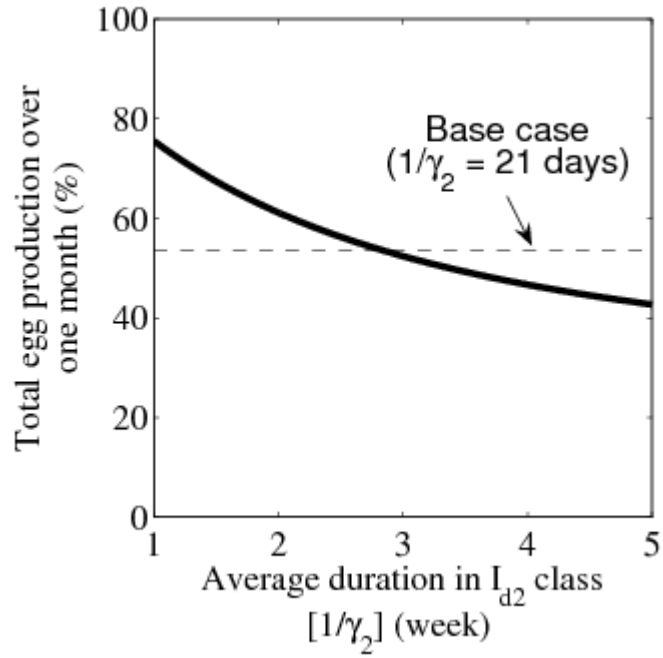

**Figure S1. Sensitivity of the total egg production over a month (%) to changes in the recovery rate  $\gamma_2$ .** System (8-12) was integrated numerically, using the mean values of the parameters in Table 1. Other parameters used are  $\eta = 0 \text{ d}^{-1}$ ,  $\delta = 0.01 \text{ d}^{-1}$ ,  $\mu_d = 1/1095 \text{ d}^{-1}$  and  $\mu_m = 1/30 \text{ d}^{-1}$ . Here, egg production is expressed as the percentage of the total egg production in a month in the absence of BYDV.
