# Supplementary material for: Transmission Dynamics of the Recently-Identified BYD Virus Causing Duck Egg-Drop Syndrome
Source: PLOS journal article supplement (doi:10.1371/journal.pone.0035161), 2012-04-18
Supplement: S1 (10.1371/journal.pone.0035161.s001) [file journal.pone.0035161.s001]

### Appendix S1. Calculation of the reproductive number using the next generation matrix.

In this section, we derive  $R_0$ , the reproductive number, using the next generation matrix method [16-18]. It is easy to see that the scaled model system has exactly one disease-free equilibrium  $E_0 = (1,0,0,1,0)$  and the equations for the infectious compartments of the linearized system of the scaled model at  $E_0$  take the form:

$$\frac{d\hat{I}_{d1}}{dt} = -(\lambda_d + \gamma_1)\hat{I}_{d1} + \beta_d\hat{I}_m, \quad (9)$$

$$\frac{d\hat{I}_{d2}}{dt} = \gamma_1\hat{I}_{d1} - (\lambda_d + \gamma_2 + \delta)\hat{I}_{d2}, \quad (10)$$

$$\frac{d\hat{I}_m}{dt} = \beta_m(\hat{I}_{d1} + \hat{I}_{d2}) - \lambda_m\hat{I}_m. \quad (11)$$

We now introduce the following matrices:

$$F = \begin{pmatrix} 0 & 0 & \beta_d \\ 0 & 0 & 0 \\ \beta_m & \beta_m & 0 \end{pmatrix},$$

$$V = \begin{pmatrix} \lambda_d + \gamma_1 & 0 & 0 \\ -\gamma_1 & \lambda_d + \gamma_2 + \delta & 0 \\ 0 & 0 & \lambda_m \end{pmatrix}.$$

These expressions give

$$FV^{-1} = \begin{pmatrix} 0 & 0 & \frac{\beta_d}{\lambda_m} \\ 0 & 0 & 0 \\ \frac{\beta_m(\lambda_d + \gamma_1 + \gamma_2 + \delta)}{(\lambda_d + \gamma_1)(\lambda_d + \gamma_2 + \delta)} & \frac{\beta_m}{\lambda_d + \gamma_2 + \delta} & 0 \end{pmatrix}.$$

Then  $R_0$  corresponds to the spectral radius of  $FV^{-1}$ :

$$R_0 = \rho(FV^{-1}) = \sqrt{\frac{\beta_d\beta_m(\lambda_d + \gamma_1 + \gamma_2 + \delta)}{\lambda_m(\lambda_d + \gamma_1)(\lambda_d + \gamma_2 + \delta)}}.$$

This expression is also obtained when derived from the original (unscaled) system of ODEs (Eq. 1). Note that in the scaled equation,  $S_0 = 1$ . If a proportion  $v$  of ducks is vaccinated at the beginning of the infection, the total susceptible population reduces to  $(1-v)S_0$  assuming that the vaccine provides perfect protection against BYDV. In this case, the effective reproductive number under vaccination,  $R_0^v$ , is given by

$$R_0^v = \sqrt{\frac{\beta_d \beta_m (\lambda_d + \gamma_1 + \gamma_2 + \delta)}{\lambda_m (\lambda_d + \gamma_1) (\lambda_d + \gamma_2 + \delta)}} (1 - v) = \sqrt{1 - v} R_0.$$

Therefore the minimum vaccination proportion,  $v_{min}$ , required to bring the reproductive number below one (i.e.  $R_0^v < 1$ ) is

$$v_{min} = 1 - \frac{1}{R_0^2}.$$
