# Supplementary material for: Transmission Dynamics of the Recently-Identified BYD Virus Causing Duck Egg-Drop Syndrome
Source: PLOS journal article supplement (doi:10.1371/journal.pone.0035161), 2012-04-18
Supplement: S3 (10.1371/journal.pone.0035161.s003) [file journal.pone.0035161.s003]

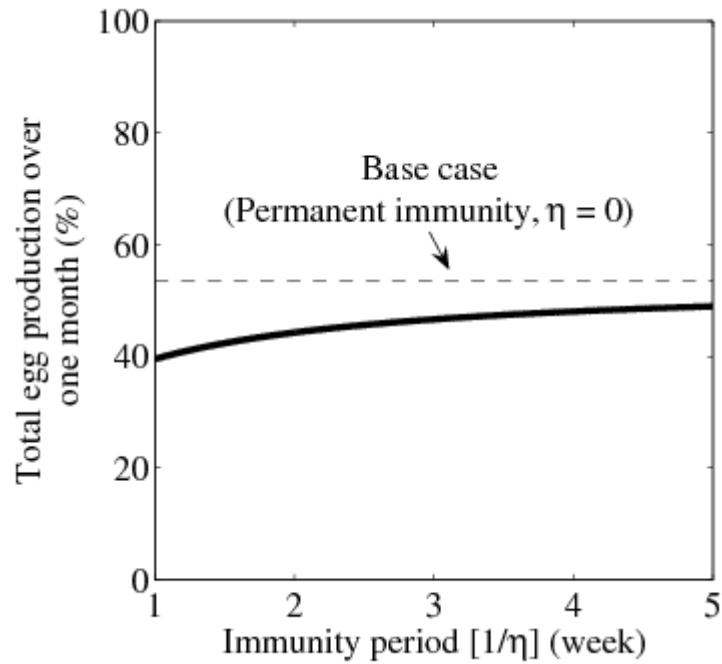

**Figure S2. Sensitivity of the total egg production over a month (%) to changes in the rate of immunity loss,  $\eta$ .** System (8-12) was integrated numerically, using the mean values of the parameters in Table 1. Other parameters used are  $\gamma_2 = 1/21 \text{ d}^{-1}$ ,  $\delta = 0.01 \text{ d}^{-1}$ ,  $\mu_d = 1/1095 \text{ d}^{-1}$  and  $\mu_m = 1/30 \text{ d}^{-1}$ . Here, egg production is expressed as the percentage of the total egg production in a month in the absence of BYDV.
