# Supplementary material for: Transmission Dynamics of the Recently-Identified BYD Virus Causing Duck Egg-Drop Syndrome
Source: PLOS journal article supplement (doi:10.1371/journal.pone.0035161), 2012-04-18
Supplement: S4 (10.1371/journal.pone.0035161.s004) [file journal.pone.0035161.s004]

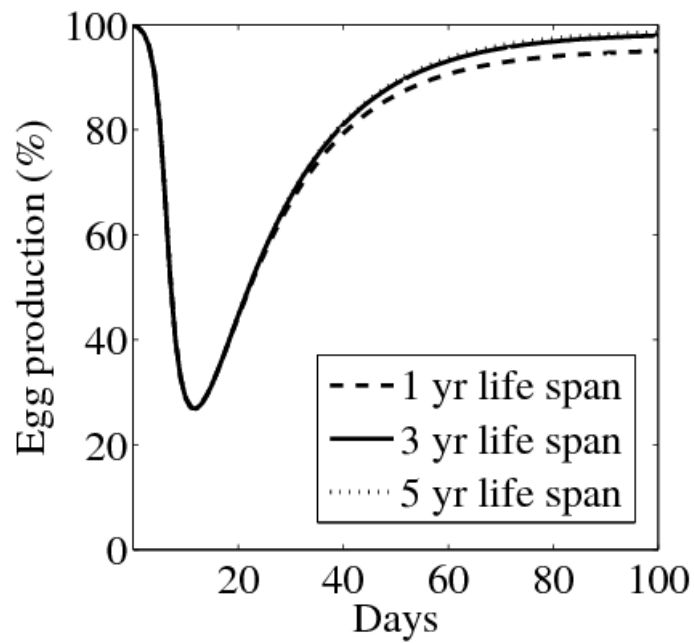

**Figure S3. Sensitivity of the egg production dynamics to changes in the duck life span,  $1/\mu_d$ .** System (8-12) was integrated numerically, using the mean values of the parameters in Table 1. Other parameters used are  $\gamma_2 = 1/21 \text{ d}^{-1}$ ,  $\delta = 0.01 \text{ d}^{-1}$ ,  $\eta = 0 \text{ d}^{-1}$  and  $\mu_m = 1/30 \text{ d}^{-1}$ . Our results are clearly insensitive to the duck life span.
