# Supplementary material for: Transmission Dynamics of the Recently-Identified BYD Virus Causing Duck Egg-Drop Syndrome
Source: PLOS journal article supplement (doi:10.1371/journal.pone.0035161), 2012-04-18
Supplement: S5 (10.1371/journal.pone.0035161.s005) [file journal.pone.0035161.s005]

1  
2  
3  
4  
5  
6  
7  
8  
9  
10  
11  
12  
13  
14  
15  
16  
17  
18  
19  
20  
21  
22  
23

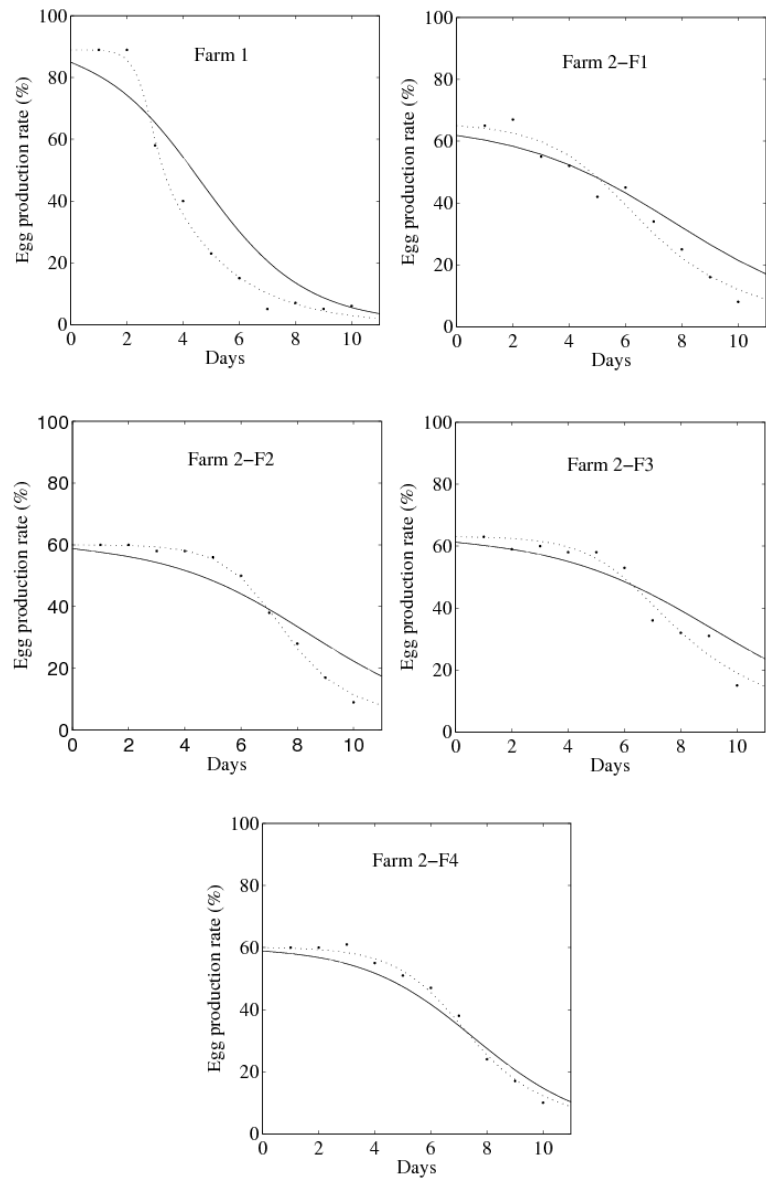

**Figure S4. Egg production rate predicted by the model with direct transmission (solid line), the model with mosquito-borne transmission (dashed line) along with the data (dots). Egg production rate as expressed in % (y-axis) represents the percentage of ducks that produce eggs out of the total ducks in the flock on day  $n$ . See table S1 for estimated parameters with direct transmission and for a comparison of the goodness of fit.**
