# Supplementary material for: Transmission Dynamics of the Recently-Identified BYD Virus Causing Duck Egg-Drop Syndrome
Source: PLOS journal article supplement (doi:10.1371/journal.pone.0035161), 2012-04-18
Supplement: S6 (10.1371/journal.pone.0035161.s006) [file journal.pone.0035161.s006]

**Table S1. Estimated parameters using model with direct transmission route.** The model system with direct transmission consists of 4 ODEs (excluding the mosquito population). The transmission term is modeled as  $\beta(\hat{I}_{d1} + \hat{I}_{d2})S_d$ . We fit this model to the same data.  $AIC_c^D$  and  $AIC_c^V$  represent Akaike’s “information criterion” values for the model with direct transmission and the model with mosquito-borne transmission, respectively. Lower  $AIC_c$  values indicate better fits to the data. The model including vector-borne transmission always provides a superior fit.

|           | $\beta$ | $\gamma_1$ | $p_I$ | $\hat{I}_{d1}(0)$ | $\hat{I}_{d2}(0)$     | $AIC_c^D$ | $AIC_c^V$ |
|-----------|---------|------------|-------|-------------------|-----------------------|-----------|-----------|
| Farm 1    | 8.22    | 1.06       | 0.43  | 0.68              | $1.93 \times 10^{-4}$ | -2.52     | -32.50    |
| Farm 2-F1 | 4.64    | 0.11       | 0.31  | 0.73              | $6.86 \times 10^{-3}$ | -13.10    | -24.00    |
| Farm 2-F2 | 3.88    | 0.25       | 0.35  | 0.51              | $4.83 \times 10^{-4}$ | -13.12    | -50.70    |
| Farm 2-F3 | 3.51    | 0.21       | 0.27  | 0.84              | $2.60 \times 10^{-3}$ | -15.43    | -27.86    |
| Farm 2-F4 | 4.89    | 0.14       | 0.33  | 0.58              | $1.41 \times 10^{-3}$ | -24.26    | -42.55    |
